# Supplementary material for: Population-Based Studies on the Epidemiology of Insulin Resistance in Children
Source: J Diabetes Res. 2015 Jul 27;2015:362375. doi: 10.1155/2015/362375 (PMC4530262; doi:10.1155/2015/362375)
Supplement: Supplementary file 1 — The supplemental table contains an overview of all studies included in the review. Data provided in this table are the study method, sample size, age of participants, ethnicity (if reported), criteria to determine IR and overall prevalence rates. If available, prevalence rates for subgroups based on weight category (normal weight, overweight and obesity) and gender were presented. [file 362375.f1.xlsx]

## Sheet: All population based studies
Nr.	Country, calender time	Methods	Sample representative for:	Sample size	Participation degree	Age	Ethnicity	Measurements to determine IR	Criteria IR	Prevalence IR (%)						Remarks
										Overall	Weight category			Sex
											Normal weight	Over-weight	Obese	Boys	Girls
ASIA
1	China, NR	Cross-sectional population based survey	Chinese children living in Beijing	3373	NR	6-18	Chinese	Fasted blood sample (FPG and FPI)	HOMA-IR ≥ 3,0	25*	8.9*	28.1*	43.8*	26.9*	23.0*
2	India, NR	Randomly selected sample of population based study (Epidemiological Study of Adolescents and Young adults (ESAY))	Adolescents (14-19 yr) in New Delhi region.	948	NR	14-19	Asian Indian	Fasted blood sample (FPI)	14-15 yr: ♂FPI > 128.5 pmol/l, ♀ >164.8 pmol/l	35.4		67.3
									16-17yr: ♂FPI > 126.1 pmol/l, ♀ >152.6 pmol/l
									18-19 yr: ♂FPI > 121.2 pmol/l, ♀ >162.4 pmol/l
3	India, NR	Door-to-door demographic survey of representive wards of Chennai city.	Children and adolescents in urban South-India	1519	0.74	6-19	Asian Indian	Fasted blood sample (FPG and FPI)	HOMA-IR ≥ 3.56					7.8	12.5
4	India, 2000-2003	Randomly selected sample of population based study (ESAY)	Adolescents (14-19 yr) in New Delhi region.	793	NR	14-19	Asian Indian	Fasted blood sample (FPI)	FPI> 20 μU/ml	34.2*	29	63.9		18.9*	49.7*
5	Japan, 2009	Cross-sectional study of standard health examination with additional blood sampling in schoolchildren in 5th and 8th grade	Children and adolescents (10-13 yr) in region of Nagano Prefecture	310	0.99	10-13	Japanese	Fasted blood sample (FPG and FPI)	HOMA-IR ≥ 2.5	21.6		46.8
AUSTRALIA
6	Australia, 2004	Cross-sectional population survey of Grade 10 students in NSW School Physical Activity and Nutrition Survey 2004 (SPANS 2004)	Grade 10 students in Sydney metropolitan area (population 4.2 million)	495	NR	14.3-17.1	NR	Fasted blood sample (FPI)	FPI > 100pmol/l	20.6*	♂ 7.1	♂ 29.5	♂ 68.4	19.3	22.4
											♀ 10.9	♀ 41.9	♀ 44.4
7	New Zealand, NR	Observational study of pacific island teenagers living in New Zealand, recruited by PI community workers	PI teenagers living in the community in Dunedin, New Zealand	80	83.0%	15-18	Pacific Island	Fasted blood sample (FPG, FPI and fasted triglycerides)	FPI > 12 μIU/ml	44						40% of sample is overweight, 36% is obese
									HOMA2 > 2 or	26.9				17.5	36.8
									McAuley index ≤ 6.3					20.0	34.2
CARIBBEAN AND CENTRAL AMERICA
8	Mexico, NR	Cross-sectional survey in subjects randomly selected from public schools in Mexico-City	Adolescents 12-16 yr in Mexico-City	1850	40.1%	12-16	NR	Fasted blood sample (FPG and FPI)	FPI > 9.85 μIU/ml (p75)	24.8 *				4.9*	24.7*
									HOMA-IR > p85 (~3.0)	15.3 *				12.7*	17.2*
EUROPE
9	Czech Republic, NR	Cross-sectional study of a general population cohort	Czech adolescents 13.0-17.9 yr	1518	NR	13.0-17.9	NR	Fasted blood sample (FPG and FPI)	HOMA-IR > 2.5	40.7 *				40.9	40.5
									HOMA-IR > 4.0	13.2 *				14.3	10.8
10	Greece, 2007	Large scale, cross-sectional epidemiological study	Greek schoolchildren 9-13yr	2026	64.1%	9-13	NR	Fasted blood sample (FPG and FPI)	HOMA-IR > 3.16	28.4	16.7	38.0	59.6	22.4	33.2
									HOMA-IR > 3.99	16.6	8.5	22.8	39.1	12.2	20.0
									HOMA-IR > 5.56	6.0	2.4	8.0	19.1	4.5	7.4
11	Greece, 2005-2006	Observational population based study on school children in Crete	Adolescents 10-12yr on Crete	248	NR	10-12	NR	Fasted blood sample (FPG and FPI)	HOMA-IR >2.1	9.2	2.9	10.5	31.0	9.20	9.17
									HOMA-IR > 3.16	3.1	1.9	1.8	10.3	4.60	1.83
									QUICKI < 0.35	12.8	3.9	16.2	41.4	10.34	14.68
									FGIR < 7	17.4	6.8	22.8	45.9	13.79	20.18
12	Italy, 2007-2008	Cross-sectional study of children randomly selected from schools	Adolescents 11-13yr in Southern Italy	575	68.2%	11-13	NR	Fasted blood sample (FPG and FPI)	FPI > p75 (♂ 11.0 pmol/l; ♀ 13.2 mol/l)	25.2 *	♂ 12.4	♂ 25.6	♂ 60.4	25.3*	25.1*	Cut-off point for FPI and HOMA-IR based on p75 of this population
											♀ 11.2	♀ 38.2	♀ 65.5
									HOMA-IR > p75 (♂ 2.28, ♀ 2.67)	25.0 *	♂ 13.1	♂ 26.7	♂ 54.7	25.0*	25.1*
											♀ 11.8	♀ 37.1	♀ 65.5
13	Turkey, NR	Cross-sectional survey in randomly selected school children, schools stratified for geographical location and socioeconomic levels.	Turkish adolescents 12-19yr living in region of Kayseri	790	97.3%	12-19	NR	Fasted blood sample (FPG and FPI)	HOMA-IR <3.16	34.7				33.0	36.1	Cut-off point <3.16, while all other studies that use HOMA-IR define IR as HOMA-IR > (…)
NORTH-AMERICA
14	U.S., 2008-2011	Cross-sectional convenience sample of school-based medical screening	Children attending public high school in New York	1185	0.63	14-19	Hispanic, African-American, other	Fasted blood sample (FPG and FPI)	HOMA-IR > 4	19.5	4.5	12.4	37.8
15	U.S., NR	Observational cross-sectional study in middle-school students (TEAMS project)	Adolescents 11-14 yr in inland Pacific Northwest of US	151	NR	11-14	NR	Fasted blood sample (FPG and FPI)	HOMA-IR ≥ 2.7	33.5 *	22.7		62.5			> 27% of participants BMI > p95
16	U.S., 2002-2003	Cross-sectional observational study among schoolchildren of schools in Wausau school district	Children and adolescents in urban region of Wausau, U.S.	535	NR	7-17	13% minority students	Fasted blood sample (FPG and FPI)	HOMA-IR > p85 of normal weight children (BMI <p85)	~25		50				Specific cut-off value for IR not mentioned in the article. Specific prevalence also not mentioned.
SOUTH-AMERICA
17	Argentina, 2005	Descriptive study of high-school students in the city of Posadas (total amount of adolescents 12-18yr: 35,000)	Adolescents in urban region of Posadas, Argentina	420	0.6	12-18	NR	Fasted blood sample (FPG and FPI)	FPI ≥ 12 mU/l	11.7
									HOMA-IR ≥ 2.5	10.5				10.6	10.4
									QUICKI ≤ 0.33	9.8				6.3	11.9
18	Chile, 2009-2011	Cross-sectional study of children in public schools in Puente Alto County	Chilean children	3325	59.2%	10-15	Chilean	Fasted blood sample (FPG and FPI)	HOMA-IR > p90 for sex and Tanner stage (♂ Tanner I and II: 3.2; Tanner III and IV: 4.2; ♀ Tanner I and II 4.1, Tanner III and IV: 5.0)	25.9				26.9	24.8
* Calculated by the authors; † extracted from graph.
Abrreviations: FPG: fasted plasma glucose; FPI: fasted plasma insulin; HOMA-IR: Homeostasis Model assessment Insulin resistance; MA: Mexican-American; NR: not reported; QUICKI: quantitative insulin sensitivity check index
Calculations: HOMA-IR = FPG (mmol/l)*FPI (mU/l) / 22,5 or FPG (mg/dl)*FPI (mU/l) / 405; HOMA2: calculated with HOMA2calculator http://www.dtu.ox.ac.uk/homacalculator/index.php; McAuley index= 2.63 -0.28 ln[fasting insulin] -0.31 ln[fasting triglycerides]; QUICKI= 1/ [(log (FPI (mU/l))+ log (FPG (mg/dl))]
References:
1	Wang Q, Yin J, Xu L, et al. Prevalence of metabolic syndrome in a cohort of Chinese schoolchildren: comparison of two definitions and assessment of adipokines as components by factor analysis. BMC Public Health 2013; 13:249.
2	Vikram NK, Misra A, Pandey RM, Luthra K, Bhatt SP. Distribution and cutoff points of fasting insulin in Asian Indian adolescents and their association with metabolic syndrome. J Assoc Physicians India 2008; 56: 949-54.
3	Ranjani H, Sonya J, Anjana R, Mohan V. Prevalence of glucose intolerance among children and adolescents in urban south india (ORANGE-2). Diabetes technology & therapeutics. 2013;15(1):13
4	Vikram NK, Misra A, Pandey RM, Luthra K, Wasir JS, Dhingra V. Heterogeneous phenotypes of insulin resistance and its implications for defining metabolic syndrome in Asian Indian adolescents. Atherosclerosis 2006; 186: 193-99.
5	Fujii C, Sakakibara H. Association between insulin resistance, cardiovascular risk factors and overweight in Japanese schoolchildren. Obes Res Clin Pract 2012; 6: e1-e8.
6	Denney-Wilson E, Cowell CT, Okely AD, Hardy LL, Aitken R, Dobbins T. Associations between insulin and glucose concentrations and anthropometric measures of fat mass in Australian adolescents. BMC Pediatr 2010; 10: 58.
7	Grant AM, Taungapeau FK, McAuley KA, et al. Body mass index status is effective in identifying metabolic syndrome components and insulin resistance in Pacific Island teenagers living in New Zealand. Metabolism 2008; 57: 511-16.
8	Cardoso-Saldana GC, Yamamoto-Kimura L, Medina-Urrutia A, Posadas-Sanchez R, Caracas-Portilla NA, Posadas-Romero C. [Obesity or overweight and metabolic syndrome in Mexico City teenagers.]. Arch Cardiol Mex 2010; 80: 12-18.
9	Aldhoon-Hainerova I, Zamrazilova H, Dusatkova L, et al. Glucose homeostasis and insulin resistance: Prevalence, gender differences and predictors in adolescents. Diabetol Metab Syndr. 2014;6(1):100-5996-6-100.
10	Androutsos O., Moschonis G., Mavrogianni C., et al. Identification of lifestyle patterns, including sleep deprivation, associated with insulin resistance in children: The healthy growth study. Eur J Clin Nutr. 2014;68(3):344-349
11	Manios Y, Moschonis G, Kourlaba G, et al. Prevalence and independent predictors of insulin resistance in children from Crete, Greece: the Children Study. Diabet Med 2008; 25: 65-72.
12	Caserta CA, Pendino GM, Alicante S, et al. Body mass index, cardiovascular risk factors, and carotid intima-media thickness in a pediatric population in southern Italy. J Pediatr Gastroenterol Nutr 2010; 51: 216-20.
13	Budak N, Ozturk A, Mazicioglu M, Yazici C, Bayram F, Kurtoglu S. Decreased high-density lipoprotein cholesterol and insulin resistance were the most common criteria in 12- to 19-year-old adolescents. Eur J Nutr 2010; 49: 219-25.
14	Turchiano M, Sweat V, Fierman A, Convit A. Obesity, metabolic syndrome, and insulin resistance in urban high school students of minority race/ethnicity. Arch Pediatr Adolesc Med 2012; 166: 1030-36.
15	Bindler RC, Daratha KB. Relationship of Weight Status and Cardiometabolic Outcomes for Adolescents in the TEAMS Study. Biol Res Nurs 2012; 14: 65-70.
16	Hughes P, Murdock DK, Olson K, et al. School children have leading risk factors for cardiovascular disease and diabetes: the Wausau SCHOOL project. WMJ 2006; 105: 32-39.
17	Bonneau GA, Pedrozo WR, Castillo Rascon MS, Albrekt AL. Prevalence of insulin resistance in adolescents in the city of Posadas. Recommended diagnostic criteria. Rev Argent Endocrinol Metab 2011; 48: 78-86.
18	Mardones F, Arnaiz P, Barja S, et al. Nutritional status, metabolic syndrome and insulin resistance in children from santiago (chile). Nutr Hosp. 2013;28(6):1999-2005.
